# Supplementary material for: Palmitoylation regulates vesicular trafficking of R-Ras to membrane ruffles and effects on ruffling and cell spreading
Source: PubMed Central journal article supplement — Small GTPases. 2012 Jul 1;3(3):139–53. doi: 10.4161/sgtp.21084 (PMC3442799; doi:10.4161/sgtp.21084), 2012-07-01
Supplement: sgtp-3-139-s01.pdf [file sgtp-3-139-s01.pdf]

## **Supplemental Material to:**

**Jeremy G.T. Wurtzel, Puneet Kumar  
and Lawrence E. Goldfinger**

**Palmitoylation regulates vesicular trafficking of R-Ras  
to membrane ruffles and effects on ruffling and cell  
spreading.**

**Small GTPases 2012; 3 (3)**

**<http://dx.doi.org/10.4161/sgtp.21084>**

**<http://www.landesbioscience.com/journals/smallgtpases/article/21084/>**

**Figure S1**

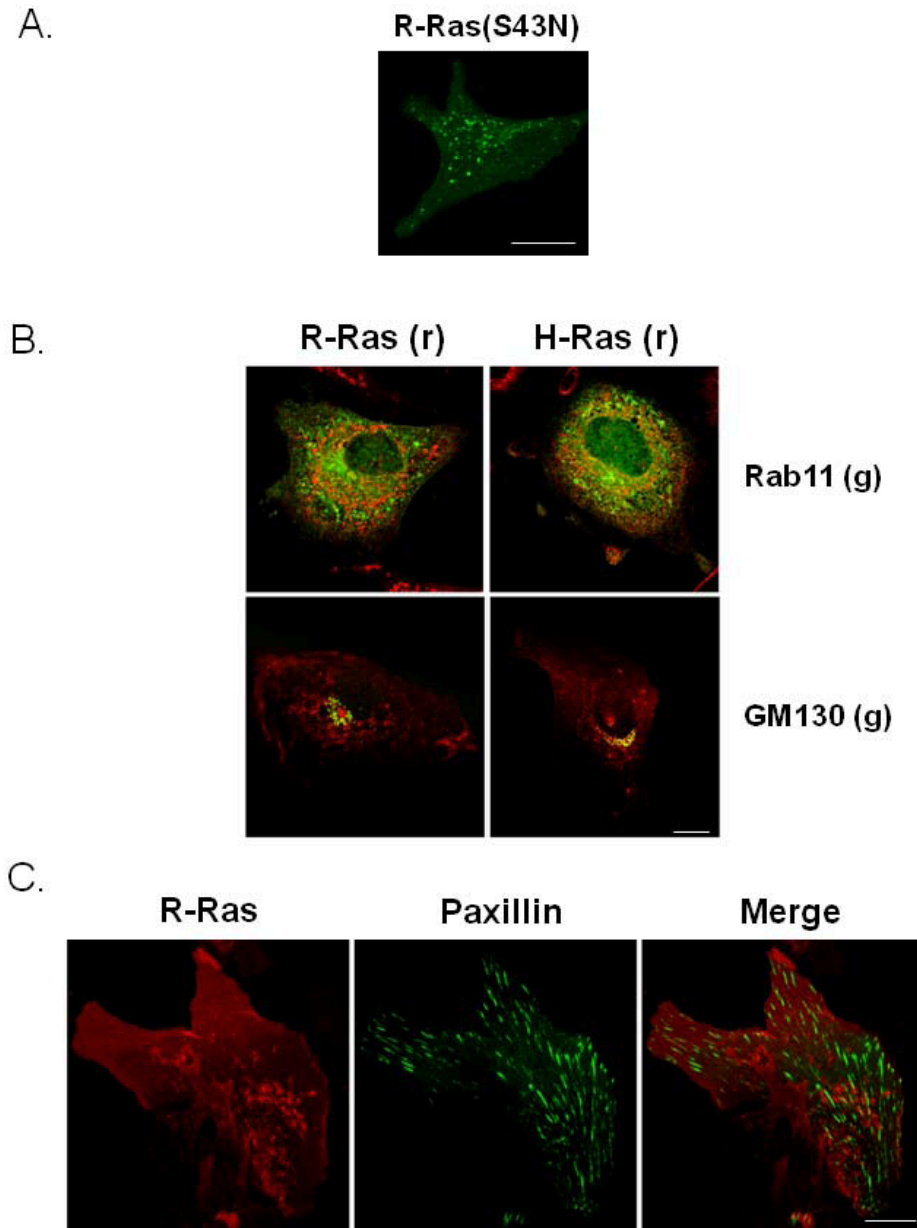

**Figure S1.** Dominant negative R-Ras is mistargeted in cells; endogenous R-Ras and H-Ras staining patterns; R-Ras does not localize to focal adhesions in NIH 3T3 cells. (A) GFP-R-Ras(S43N) imaged in a live cell. (B) Cells transfected with GFP-Rab11 (top) or GFP-GM130 (bottom, green) were fixed in formaldehyde and labeled with antibodies for R-Ras (left) or H-Ras (right) followed by fluorescent secondary antibody conjugates (red). (C) RFP-R-Ras(wt) (red) and GFP-paxillin (green) were co-transfected and imaged in a live cell seeded on a fibronectin-coated surface. Confocal laser scanning was performed in series for each fluorophore at the same z-axis plane (1  $\mu\text{m}$  thick). Bars, 10  $\mu\text{m}$ .

**Figure S2**

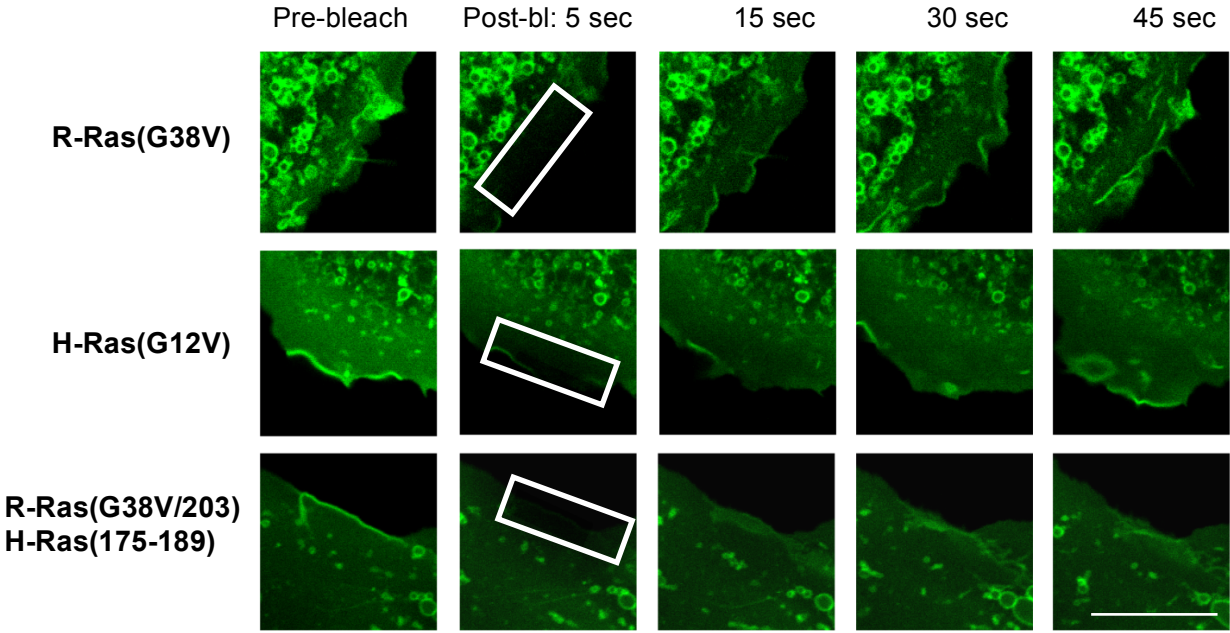

**Figure S2.** FRAP imaging for GFP-R-Ras or -H-Ras in migrating cells. Representative images from FRAP series in Figure 3. The white box shows the bleach area. Bar, 7.5  $\mu\text{m}$ .

**Video S1.** R-Ras vesicular trafficking in migrating cells. RFP-R-Ras(G38V) (red) and GFP-Rab11 (green) were imaged by confocal fluorescence scanning in 30 sec intervals in living NIH 3T3 cells seeded on fibronectin-coated surfaces.

**Video S2.** R-Ras activation is required for anterograde vesicular trafficking. GFP-R-Ras(S43N) was imaged by confocal fluorescence scanning in 15 sec intervals in living NIH 3T3 cells seeded on fibronectin-coated surfaces.

**Video S3.** R-Ras(G38V) and R-Ras(G38V/203)H-Ras(175-189) vesicular trafficking and segregation in migrating cells. GFP-R-Ras(G38V) (green) and RFP-R-Ras(G38V/203)H-Ras(175-189) (red) were imaged by confocal fluorescence scanning in 30 sec intervals in living NIH 3T3 cells seeded on fibronectin-coated surfaces. The leading edge of the cell is to the lower right (now shown). Manual tracking of a R-Ras(G38V) vesicle (blue line) and a RFP-R-Ras(G38V/203)H-Ras(175-189) vesicle (green line) reveal the segregation and rapid anterograde trafficking of R-Ras(38V) from R-Ras containing the H-Ras HVR.

**Video S4.** R-Ras(G38V/203)H-Ras(175-189) vesicular trafficking in migrating cells. RFP-R-Ras(G38V/203)H-Ras(175-189) (red) and GFP-Rab11 (green) were imaged by confocal fluorescence scanning in 1 min intervals in living NIH 3T3 cells seeded on fibronectin-coated surfaces.

**Video S5.** R-Ras(G38V) and PH-Akt in membrane ruffles. RFP-R-Ras(G38V) (red, Vid. S5A) and GFP-PH-Akt (green, Vid. S5B) were imaged by confocal fluorescence microscopy in 30 sec intervals in living NIH 3T3 cells seeded on fibronectin-coated surfaces. Merged image sequence is shown in Video S5C.
